# Supplementary material for: Predicting 6-Year Mortality Risk in Patients With Type 2 Diabetes
Source: Oxford University Press journal article supplement (doi:10.2337/dc08-1047), 2008-09-23
Supplement: dc081047-sup-appendix_a_coefficients_and_associated_p-values_from_the_survival_model.doc [file dc081047-sup-appendix_a_coefficients_and_associated_p-values_from_the_survival_model.doc]

**Appendix A.** Coefficients and associated p-values from the survival model.

| **Variable** | **Coefficient** | **P value** |
| --- | --- | --- |
| GFR | -0.022 | <0.001 |
| GFR’ | 0.018 | <0.001 |
| Age | 0.064 | <0.001 |
| Age’ | -0.002 | 0.770 |
| Medication = MEG | 3.195 | 0.020 |
| Medication = SFU | 1.803 | 0.005 |
| Medication = TZD | 2.411 | 0.003 |
| Gender = Male | 0.177 | <0.001 |
| Caucasian = Yes | 0.204 | <0.001 |
| History of CAD = Yes | 0.052 | 0.277 |
| Hba1c | -0.060 | 0.021 |
| Hba1c’ | 0.112 | 0.005 |
| BMI | -0.036 | <0.001 |
| BMI’ | 0.047 | <0.001 |
| Heart Failure = Yes | 0.458 | <0.001 |
| SBP | -0.011 | <0.001 |
| SBP’ | 0.010 | <0.001 |
| DBP | -0.013 | <0.001 |
| DBP’ | 0.006 | 0.056 |
| HDL | -0.004 | 0.16 |
| HDL’ | 0.008 | 0.027 |
| LDL | -0.004 | <0.001 |
| LDL’ | 0.004 | 0.004 |
| Triglycerides | -0.001 | 0.073 |
| Triglycerides’ | 0.001 | 0.060 |
| Smoke = Quit | 0.161 | <0.001 |
| Smoke =Yes | 0.377 | <0.001 |
| Insulin = Yes | 0.473 | <0.001 |
| ACE/ARB = Yes | -0.128 | <0.001 |
| New Diabetes = No | 0.249 | 0.001 |
| Aspirin = Yes | -0.045 | 0.276 |
| Plavix = Yes | 0.159 | 0.009 |
| Lipid Drug = No | 0.200 | <0.001 |
| Lipid Drug = After lipid panel | -0.091 | 0.104 |
| GFR * Med = MEG | 0.006 | 0.422 |
| GFR * Med = MEG | -0.004 | 0.697 |
| GFR * Med = SFU | 0.006 | 0.171 |
| GFR’ * Med = SFU | -0.006 | 0.191 |
| GFR * Med = TZD | -0.004 | 0.441 |
| GFR’ * Med = TZD | -0.001 | 0.868 |
| Age * Med = MEG | -0.051 | 0.032 |
| Age’ * Med = MEG | 0.035 | 0.092 |
| Age * Med = SFU | -0.025 | 0.019 |
| Age’ * Med = SFU | 0.008 | 0.405 |
| Age * Med = TZD | -0.033 | 0.016 |
| Age’ * Med = TZD | 0.022 | 0.089 |

’ = 2nd part of restricted cubic spline.
